# Supplementary material
Source: PubMed Central journal article supplement (PMC5301152)
Supplement: cmi201561x1.pdf [file cmi201561x1.pdf]

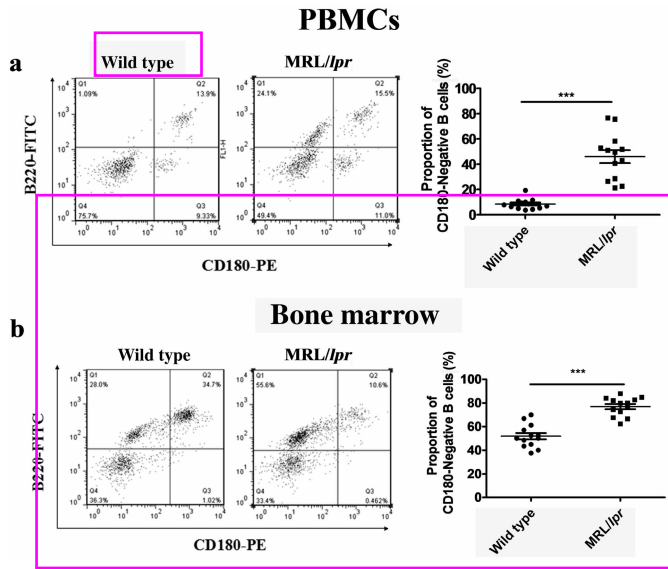

**Supplemental Figure 1 Population of CD180-negative B cells in the bone marrow and PBMCs of mice. (a and b)** Flow cytometric analysis of the CD180-negative B-cell population in the bone marrow (**a**) and PBMCs (**b**) of MRL/lpr mice ( $n = 13$ ) and wild-type mice ( $n = 13$ ). Error bars represent the SEM. \* $p < 0.05$ , \*\* $p < 0.01$ , \*\*\* $p < 0.001$ , as determined by  $t$ -test; ns denotes  $p > 0.05$ .

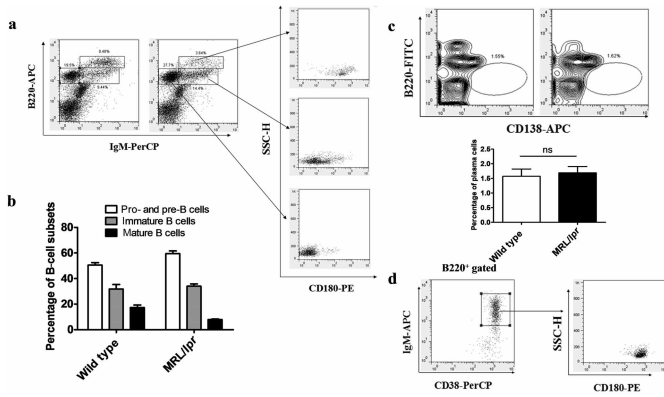

**Supplemental Figure 2 Phenotypic analysis of CD180-negative B cells in the bone marrow.** (a) Flow cytometric analysis of CD180 expression on B220<sup>low</sup> IgM<sup>-</sup> pre- and pro-B cells, B220<sup>low</sup> IgM<sup>+</sup> immature B cells and B220<sup>+</sup> IgM<sup>+</sup> mature B cells in the bone marrow. (b) Percentage of pro- and pre-B cells, immature B cells and mature B cells in the bone marrow from wild-type mice ( $n = 5$ ) and MRL/lpr mice ( $n = 5$ ). (c) Percentage of plasma cells in the bone marrow from wild-type mice ( $n = 5$ ) and MRL/lpr mice ( $n = 5$ ). (d) Flow cytometric analysis of CD180 expression on B220<sup>+</sup> IgM<sup>+</sup> CD38<sup>+</sup> memory B cells in the bone marrow. Error bars represent the SEM. \* $p < 0.05$ , \*\* $p < 0.01$ , \*\*\* $p < 0.001$ , as determined by  $t$ -test; ns denotes  $p > 0.05$ .
